# Supplementary material for: Clinically Actionable Insights into Initial and Matched Recurrent Glioblastomas to Inform Novel Treatment Approaches
Source: Hindawi journal article supplement (doi:10.1155/2019/4878547), 2019-12-31
Supplement: f1 [file 4878547.f1.zip]

## SUPPLEMENTARY MATERIALS

### FIGURES

Figure S1. Oncoprint plot of mutations and copy number alterations identified in the TCGA-GBM dataset for 8 corresponding genes impacted by CNVs in the GBM cohort. Genes are represented as rows and individual patients are represented as columns. The right barplot displays the number and type of alterations to each gene, categorised as: AMP: High level amplification; GAIN: low level gain; HETLOSS: shallow deletion; HOMDEL: deep deletion and MUT: SNV mutation event (green).

Figure S2. Oncoprint plot of mutations and copy number alterations identified in the TCGA-GBM dataset for the 21 corresponding genes impacted by VUS that were possibly pathogenic in the GBM cohort. Genes are represented as rows and individual patients are represented as columns. The right barplot displays the number and type of alterations to each gene, categorised as: AMP: High level amplification; GAIN: low level gain; HETLOSS: shallow deletion; HOMDEL: deep deletion and MUT: SNV mutation event (green).

Figure S3. Oncoprint plot of mutations and copy number alterations identified in the TCGA-GBM dataset for 12 WNT/Notch/SHH pathway genes impacted by SNVs in the GBM cohort. Genes are represented as rows and individual patients are represented as columns. The right barplot displays the number and type of alterations to each gene, categorised as: AMP: High level amplification; GAIN: low level gain; HETLOSS: shallow deletion; HOMDEL: deep deletion and MUT: SNV mutation event (green).

24 **TABLES**

25 Table S1. Demographic data for the *IDH*-wildtype (n=38) and *IDH*-mutant glioblastomas. Clinical records  
26 are for case ID, age, sex, tumour location on the MRI scan, *IDH1* R132H hotspot mutation status, patient  
27 survival in months and samples with matched initial and recurrent tumours.

| Patient Case ID | Age | Sex | Tumour Location    | <i>IDH</i> | Survival (months) | Matched Initial & Recurrent samples |
|-----------------|-----|-----|--------------------|------------|-------------------|-------------------------------------|
| 8               | 19  | F   | right fron/temp    | mut        | 12                | Y                                   |
| 35              | 58  | M   | right temporal     | mut        | 5                 |                                     |
| 39              | 50  | M   | right temporal     | mut        | 6                 |                                     |
| 1               | 59  | M   | left frontal       | WT         | 11                | Y                                   |
| 2               | 47  | F   | right temporal     | WT         | 17                | Y                                   |
| 3               | 48  | F   | right fron/temp    | WT         | 2                 | Y                                   |
| 4               | 60  | F   | left frontal       | WT         | 13                | Y                                   |
| 5               | 69  | F   | right frontal      | WT         | 31                | Y                                   |
| 6               | 65  | F   | right frontal      | WT         | 24                | Y                                   |
| 7               | 50  | M   | left temporal      | WT         | 14                |                                     |
| 9               | 72  | F   | right pariet/temp  | WT         | 13                |                                     |
| 10              | 61  | F   | right temporal     | WT         | 2                 | -                                   |
| 11              | 16  | M   | left parietal      | WT         | -                 |                                     |
| 16              | 52  | M   | right parietal     | WT         | 48                |                                     |
| 17              | 41  | F   | left frontal       | WT         | 20                | -                                   |
| 18              | 49  | M   | left frontal       | WT         | 5                 |                                     |
| 19              | 66  | F   | left temporal      | WT         | 21                |                                     |
| 20              | 43  | M   | left frontal       | WT         | -                 | -                                   |
| 21              | 65  | M   | left parietal      | WT         | 13                |                                     |
| 22              | 46  | F   | left temporal      | WT         | 11                |                                     |
| 23              | 50  | M   | left temp/parietal | WT         | 38                | -                                   |
| 24              | 78  | M   | N.d.               | WT         | -                 |                                     |
| 25              | 60  | M   | right occipital    | WT         | 11                |                                     |
| 26              | 59  | F   | left temporal      | WT         | 12                | -                                   |
| 27              | 67  | F   | multifocal         | WT         | 13                |                                     |
| 28              | 59  | F   | left parietal      | WT         | 11                |                                     |
| 29              | 63  | M   | left occipital     | WT         | -                 | -                                   |
| 30              | 41  | M   | left occipital     | WT         | 15                |                                     |
| 31              | 52  | F   | left frontal       | WT         | 23                |                                     |
| 32              | 51  | M   | right temporal     | WT         | -                 | -                                   |
| 33              | 75  | M   | left parieto-occ   | WT         | 4                 |                                     |
| 34              | 63  | M   | left temporal      | WT         | 8                 |                                     |
| 36              | 43  | F   | right frontal      | WT         | 10                | Y                                   |
| 37              | 49  | M   | left frontal       | WT         | 40                |                                     |
| 38              | 50  | F   | left parieto-occ   | WT         | 14                |                                     |
| 40              | 35  | F   | right frontal      | WT         | alive (50+)       | -                                   |
| 41              | 38  | F   | right frontal      | WT         | 23                |                                     |
| 43              | 68  | M   | right frontal      | WT         | 10                |                                     |
| 44              | 40  | M   | right frontal      | WT         | 5                 | -                                   |
| 45              | 74  | F   | right frontal      | WT         | 10                |                                     |
| 46              | 44  | M   | right occipital    | WT         | 11                |                                     |

28 N.d. : no data; "-" : Date of death was not listed on the clinical follow-up. Mut = mutant; WT = wildtype

29

30

Table S2. List of the clinically relevant neuro-oncology genes that were analysed by the HTS-based diagnostic panel used in this study that was developed in Ruprecht-Karls-University Heidelberg, Germany (see Sahm et al. 2016).

| Heidelberg diagnostic panel genes |               |                 |                |                |              |
|-----------------------------------|---------------|-----------------|----------------|----------------|--------------|
| <i>ABL1</i>                       | <i>CDKN2A</i> | <i>GNAS</i>     | <i>MGMT</i>    | <i>PPM1D</i>   | <i>TRAF7</i> |
| <i>ACVR1</i>                      | <i>CDKN2B</i> | <i>H2AFX</i>    | <i>MLH1</i>    | <i>PRKAR1A</i> | <i>TSC1</i>  |
| <i>AKT1</i>                       | <i>CDKN2C</i> | <i>H3F3A</i>    | <i>MLL2</i>    | <i>PTCH1</i>   | <i>TSC2</i>  |
| <i>AKT2</i>                       | <i>CHEK2</i>  | <i>HDAC2</i>    | <i>MPL</i>     | <i>PTCH2</i>   | <i>VHL</i>   |
| <i>AKT3</i>                       | <i>CIC</i>    | <i>HIST1H3B</i> | <i>MRE11A</i>  | <i>PTEN</i>    |              |
| <i>ALK</i>                        | <i>CREBBP</i> | <i>HIST1H3C</i> | <i>MSH2</i>    | <i>PTPN11</i>  |              |
| <i>APC</i>                        | <i>CSF1R</i>  | <i>HNF1A</i>    | <i>MSH6</i>    | <i>RAD50</i>   |              |
| <i>ARID1A</i>                     | <i>CTNNB1</i> | <i>HRAS</i>     | <i>MYB</i>     | <i>RAF1</i>    |              |
| <i>ARID1B</i>                     | <i>D2HGDH</i> | <i>IDH1</i>     | <i>MYBL1</i>   | <i>RB1</i>     |              |
| <i>ARID2</i>                      | <i>DAXX</i>   | <i>IDH2</i>     | <i>MYC</i>     | <i>RET</i>     |              |
| <i>ATM</i>                        | <i>DDX3X</i>  | <i>IDO2</i>     | <i>MYCN</i>    | <i>SETD2</i>   |              |
| <i>ATR</i>                        | <i>DICER1</i> | <i>JAK2</i>     | <i>MYL1</i>    | <i>SMAD4</i>   |              |
| <i>ATRX</i>                       | <i>EGFR</i>   | <i>JAK3</i>     | <i>NBN</i>     | <i>SMARCA2</i> |              |
| <i>BCOR</i>                       | <i>EZH2</i>   | <i>KDM6A</i>    | <i>NDRG2</i>   | <i>SMARCA4</i> |              |
| <i>BRAF</i>                       | <i>FBXW7</i>  | <i>KDR</i>      | <i>NF1</i>     | <i>SMARCB1</i> |              |
| <i>BRCA1</i>                      | <i>FGFR1</i>  | <i>KIAA0182</i> | <i>NF2</i>     | <i>SMARCD1</i> |              |
| <i>BRCA2</i>                      | <i>FGFR2</i>  | <i>KIT</i>      | <i>NOTCH1</i>  | <i>SMARCD2</i> |              |
| <i>BRPF1</i>                      | <i>FGFR3</i>  | <i>KLF4</i>     | <i>NOTCH2</i>  | <i>SMARCE1</i> |              |
| <i>BRPF3</i>                      | <i>FGFR4</i>  | <i>KLK1</i>     | <i>NRAS</i>    | <i>SMO</i>     |              |
| <i>C11ORF95</i>                   | <i>FLT3</i>   | <i>KRAS</i>     | <i>NTRK2</i>   | <i>STAG2</i>   |              |
| <i>CCND1</i>                      | <i>FOXO3</i>  | <i>LDB1</i>     | <i>PCDH8</i>   | <i>SUFU</i>    |              |
| <i>CCND2</i>                      | <i>FUBP1</i>  | <i>LZTR1</i>    | <i>PDGFRA</i>  | <i>TBR1</i>    |              |
| <i>CDH1</i>                       | <i>GABRA6</i> | <i>MDM2</i>     | <i>PIK3C2G</i> | <i>TCF4</i>    |              |
| <i>CDK4</i>                       | <i>GNA11</i>  | <i>MDM4</i>     | <i>PIK3CA</i>  | <i>TERT</i>    |              |
| <i>CDK6</i>                       | <i>GNAQ</i>   | <i>MET</i>      | <i>PIK3R1</i>  | <i>TP53</i>    |              |

Table S3. Summary of the possibly pathogenic VUS identified in initial and recurrent *IDH*-wildtype and - *IDH*-mutant glioblastoma tumours. The exonic non-synonymous SNVs were predicted to be damaging by both LJB SIFT and FATHMM-MKL tools and had not been recorded by the 1000G database. Descriptive information for tumour, *IDH* status, genomic position, affected gene and pathway, available dbSNP and COSMIC identifiers, functional impacts predicted by LJB SIFT and FATHMM-MKL and a shortened description from InterPro domain are provided. NA; not applicable. (See Supplementary Tables Excel File)

Table S4. Summary of SNVs identified in initial tumours. Descriptive information for tumour, *IDH* status, genomic position, reference and alternative variant alleles, affected gene and pathway, ClinVar significance, functional impacts as predicted by LJB SIFT and FATHMM-MKL and available dbSNP and COSMIC identifiers and InterPro domain description are provided. (See Supplementary Tables Excel File)

Table S5. Summary of SNVs identified in recurrent tumours. Descriptive information for tumour, *IDH* status, genomic position, reference and alternative variant alleles, affected gene and pathway, ClinVar significance, functional impacts as predicted by LJB SIFT and FATHMM-MKL and available dbSNP and COSMIC identifiers and InterPro domain description are provided. (See Supplementary Tables Excel File)

51 Table S6. Summary of CNVs identified in initial and recurrent *IDH*-wildtype glioblastomas. CNV estimation is based on the read depth (%) of  
52 the variant (V) compared to a reference control (R; see Methods).

| Sample | R / V | <i>KDR</i> | <i>TERT</i>      | <i>SMARCA4</i>   | <i>EGFR</i>       | <i>KMT2D</i>    | <i>GNAS</i>      | <i>SETD2</i>     | <i>BRCA2</i> |
|--------|-------|------------|------------------|------------------|-------------------|-----------------|------------------|------------------|--------------|
| 1a     | R     | 238 (43%)  | 215 (48%)        | 207 (30%)        |                   |                 |                  |                  |              |
|        | V     | 311 (57%)  | 229 (52%)        | <b>479 (70%)</b> |                   |                 |                  |                  |              |
| 1b     | R     | 106 (48%)  | 255 (69%)        | 119 (67%)        |                   |                 |                  |                  |              |
|        | V     | 117 (52%)  | <b>116 (31%)</b> | <b>59 (33%)</b>  |                   |                 |                  |                  |              |
| 2a     | R     |            |                  |                  | 391 (5%)          |                 |                  |                  |              |
|        | V     |            |                  |                  | <b>6917 (95%)</b> |                 |                  |                  |              |
| 2b     | R     |            |                  |                  | 556 (8%)          |                 |                  |                  |              |
|        | V     |            |                  |                  | <b>6676 (92%)</b> |                 |                  |                  |              |
| 3a     | R     |            |                  |                  | 159 (51%)         | 98 (51%)        |                  |                  |              |
|        | V     |            |                  |                  | 152 (49%)         | 95 (49%)        |                  |                  |              |
| 3b     | R     |            |                  |                  | 90 (41%)          | 46 (32%)        |                  |                  |              |
|        | V     |            |                  |                  | 132 (59%)         | <b>99 (68%)</b> |                  |                  |              |
| 4a     | R     |            |                  |                  |                   |                 | 465 (54%)        |                  |              |
|        | V     |            |                  |                  |                   |                 | 392 (46%)        |                  |              |
| 4b     | R     |            |                  |                  |                   |                 | 206 (62%)        |                  |              |
|        | V     |            |                  |                  |                   |                 | <b>128 (38%)</b> |                  |              |
| 7a     | R     |            | 229 (55%)        |                  |                   |                 |                  |                  |              |
|        | V     |            | 190 (45%)        |                  |                   |                 |                  |                  |              |
| 7b     | R     |            | 346 (70%)        |                  |                   |                 |                  |                  |              |
|        | V     |            | <b>145 (30%)</b> |                  |                   |                 |                  |                  |              |
| 36a    | R     |            |                  |                  | 614 (43%)         |                 |                  | 372 (68%)        |              |
|        | V     |            |                  |                  | 824 (57%)         |                 |                  | <b>172 (32%)</b> |              |
| 36b    | R     |            |                  |                  | 826 (50%)         |                 |                  | 76 (17%)         |              |
|        | V     |            |                  |                  | 824 (50%)         |                 |                  | <b>360 (83%)</b> |              |

53

54 Table S7. Summary of the SNVs in TCGA-GBM dataset identified for the corresponding genes with VUS that were possibly pathogenic in the  
55 GB cohort. Descriptive information for tumour sample, gene, mutation type, amino acid change, genomic position, reference and alternative  
56 variant alleles is provided. (See Supplementary Tables Excel File)

57

58 Table S8. Number of cases in TCGA-GBM and GDC mutation datasets affected by mutations in the genes identified to have VUS that are  
59 possibly pathogenic in the GB cohort. According to TCGA a total of 393 cases were tested for somatic mutations. TCGA-GBM comprises a  
60 small number of verified (n=6) and ambiguous *IDH*-mutant cases (n=2; see [https://tcga-data.nci.nih.gov/docs/publications/gbm\\_exp/IDH1-](https://tcga-data.nci.nih.gov/docs/publications/gbm_exp/IDH1-Mutated_Samples.txt)  
61 [Mutated\\_Samples.txt](https://tcga-data.nci.nih.gov/docs/publications/gbm_exp/IDH1-Mutated_Samples.txt)).

| Gene          | Pathway        | Number of Affected Cases<br>in TCGA-GBM cohort (%) |          | Number of Affected Cases<br>across the GDC |          | Number of Mutations<br>in TCGA-GBM cohort |
|---------------|----------------|----------------------------------------------------|----------|--------------------------------------------|----------|-------------------------------------------|
| <i>PTEN</i>   | RTK/Ras/PI(3)K | 137 / 393                                          | (34.86%) | 1,005 / 10,202                             | (9.85%)  | 112                                       |
| <i>TP53</i>   | P53            | 124 / 393                                          | (31.55%) | 4,008 / 10,202                             | (39.29%) | 100                                       |
| <i>EGFR</i>   | RTK/Ras/PI(3)K | 106 / 393                                          | (26.97%) | 548 / 10,202                               | (5.37%)  | 74                                        |
| <i>PIK3R1</i> | RTK/Ras/PI(3)K | 43 / 393                                           | (10.94%) | 540 / 10,202                               | (5.29%)  | 40                                        |
| <i>PIK3CA</i> | RTK/Ras/PI(3)K | 40 / 393                                           | (10.18%) | 1,403 / 10,202                             | (13.75%) | 38                                        |
| <i>IDH1</i>   | <i>IDH</i>     | 26 / 393                                           | (6.62%)  | 566 / 10,202                               | (5.55%)  | 5                                         |
| <i>PTCH1</i>  | SHH            | 14 / 393                                           | (3.56%)  | 368 / 10,202                               | (3.61%)  | 18                                        |
| <i>CREBBP</i> | WNT            | 14 / 393                                           | (3.56%)  | 578 / 10,202                               | (5.67%)  | 19                                        |
| <i>MSH6</i>   | P53            | 12 / 393                                           | (3.05%)  | 254 / 10,202                               | (2.49%)  | 16                                        |
| <i>BRCA1</i>  | P53            | 11 / 393                                           | (2.80%)  | 332 / 10,202                               | (3.25%)  | 16                                        |
| <i>BRAF</i>   | RTK/Ras/PI(3)K | 10 / 393                                           | (2.54%)  | 813 / 10,202                               | (7.97%)  | 6                                         |
| <i>DAXX</i>   | RTK/Ras/PI(3)K | 9 / 393                                            | (2.29%)  | 201 / 10,202                               | (1.97%)  | 10                                        |
| <i>ATM</i>    | P53            | 8 / 393                                            | (2.04%)  | 618 / 10,202                               | (6.06%)  | 13                                        |
| <i>TSC2</i>   | RTK/Ras/PI(3)K | 8 / 393                                            | (2.04%)  | 326 / 10,202                               | (3.20%)  | 8                                         |
| <i>PPM1D</i>  | P53            | 7 / 393                                            | (1.78%)  | 139 / 10,202                               | (1.36%)  | 9                                         |
| <i>FGFR2</i>  | RTK/Ras/PI(3)K | 6 / 393                                            | (1.53%)  | 314 / 10,202                               | (3.08%)  | 8                                         |
| <i>JAK2</i>   | RTK/Ras/PI(3)K | 5 / 393                                            | (1.27%)  | 221 / 10,202                               | (2.17%)  | 7                                         |
| <i>MYB</i>    | RTK/Ras/PI(3)K | 5 / 393                                            | (1.27%)  | 197 / 10,202                               | (1.93%)  | 5                                         |
| <i>SMO</i>    | SHH            | 4 / 393                                            | (1.02%)  | 161 / 10,202                               | (1.58%)  | 5                                         |
| <i>KLK1</i>   | RTK/Ras/PI(3)K | 2 / 393                                            | (0.51%)  | 105 / 10,202                               | (1.03%)  | 2                                         |
| <i>CHEK2</i>  | P53            | 1 / 393                                            | (0.25%)  | 158 / 10,202                               | (1.55%)  | 2                                         |

Table S9. Number of cases in TCGA-GBM and GDC datasets affected by mutations in the WNT, Notch and SHH genes identified to have somatic mutations in the GB cohort.

| Gene          | Pathway | Number of<br>Affected Cases<br>TCGA-GBM | Number of<br>Affected<br>Cases Across<br>the GDC | Number of<br>Mutations |
|---------------|---------|-----------------------------------------|--------------------------------------------------|------------------------|
| <i>APC</i>    | WNT     | 18 / 393 (4.58%)                        | 893 / 10,202                                     | 27                     |
| <i>CREBBP</i> | WNT     | 14 / 393 (3.56%)                        | 578 / 10,202                                     | 19                     |
| <i>KMT2D</i>  | WNT     | 12 / 393 (3.05%)                        | 1,140 / 10,202                                   | 17                     |
| <i>TERT</i>   | WNT     | 11 / 393 (2.80%)                        | 194 / 10,202                                     | 17                     |
| <i>DICER1</i> | WNT     | 9 / 393 (2.29%)                         | 345 / 10,202                                     | 15                     |
| <i>TCF4</i>   | WNT     | 3 / 393 (0.76%)                         | 305 / 10,202                                     | 3                      |
| <i>KLF4</i>   | WNT     | 1 / 393 (0.25%)                         | 109 / 10,202                                     | 1                      |
| <i>PTCH1</i>  | SHH     | 14 / 393 (3.56%)                        | 368 / 10,202                                     | 18                     |
| <i>PTCH2</i>  | SHH     | 7 / 393 (1.78%)                         | 223 / 10,202                                     | 8                      |
| <i>SMO</i>    | SHH     | 4 / 393 (1.02%)                         | 161 / 10,202                                     | 5                      |
| <i>NOTCH1</i> | NOTCH   | 1 / 393 (0.25%)                         | 513 / 10,202                                     | 1                      |
| <i>NOTCH2</i> | NOTCH   | 16 / 393 (4.07%)                        | 400 / 10,202                                     | 20                     |

74 Table S10. Mean and median survival time results of the survival analyses to test the impact of SNV burden on overall survival in *MGMT*  
75 methylated and unmethylated *IDH*-wildtype GBMs.  
76

| <i>MGMT</i> status | Total Variation in SNVs | N  | Mean <sup>a</sup> |            |                         |             | Median   |            |                         |             |
|--------------------|-------------------------|----|-------------------|------------|-------------------------|-------------|----------|------------|-------------------------|-------------|
|                    |                         |    | Estimate          | Std. Error | 95% Confidence Interval |             | Estimate | Std. Error | 95% Confidence Interval |             |
|                    |                         |    |                   |            | Lower Bound             | Upper Bound |          |            | Lower Bound             | Upper Bound |
| Methylated         | <= 4                    | 10 | 26.4              | 4.684      | 17.218                  | 35.582      | 23       | 3.162      | 16.802                  | 29.198      |
|                    | >= 5                    | 5  | 9.2               | 2.634      | 4.037                   | 14.363      | 10       | 5.477      | 0                       | 20.735      |
|                    | Overall                 | 15 | 20.667            | 3.841      | 13.138                  | 28.195      | 17       | 5.152      | 6.901                   | 27.099      |
| Unmethylated       | <= 4                    | 10 | 16.5              | 2.802      | 11.009                  | 21.991      | 13       | 1.186      | 10.676                  | 15.324      |
|                    | >= 5                    | 8  | 9.75              | 1.567      | 6.679                   | 12.821      | 11       | 2.143      | 6.799                   | 15.201      |
|                    | Overall                 | 18 | 13.5              | 1.849      | 9.875                   | 17.125      | 11       | 0.795      | 9.441                   | 12.559      |

77 a. Estimation is limited to the largest survival time if it is censored  
78  
79  
80
